# Supplementary material for: Feasibility and Effectiveness of a Wearable Technology-Based Physical Activity Intervention in Preschoolers: A Pilot Study
Source: MDPI journal article supplement (doi:10.3390/ijerph15091821), 2018-08-23
Supplement: s1 [file s1]

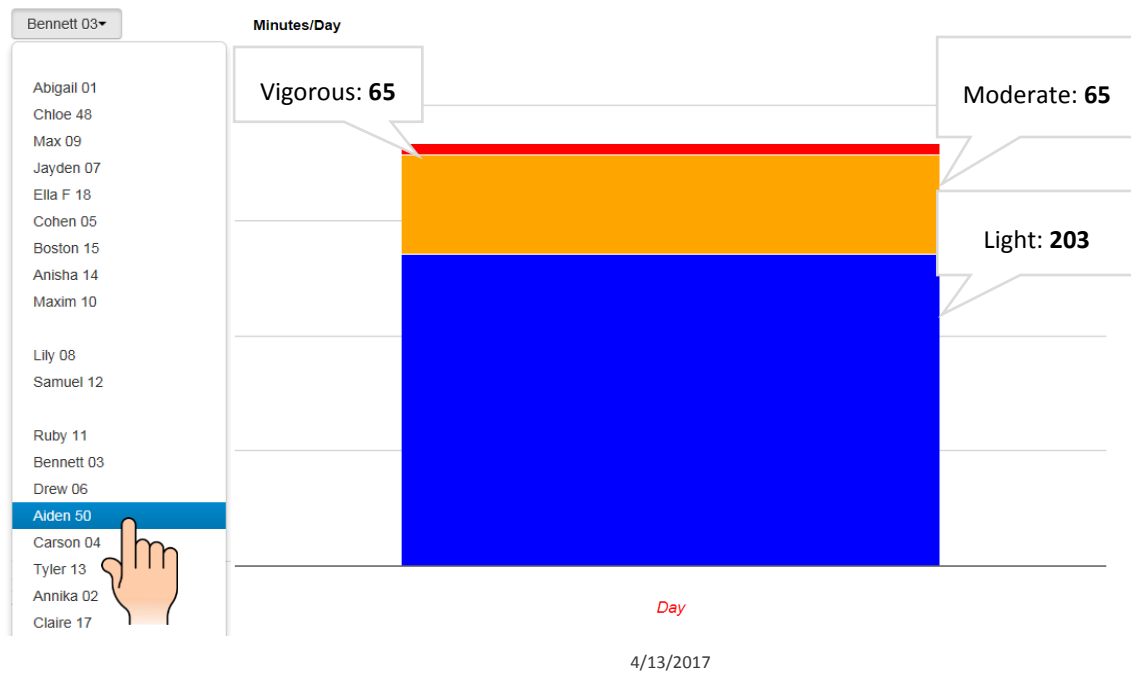

**Figure S1.** Fictional Sample Interface of Fitabase.
